# Supplementary material
Source: PubMed Central journal article supplement (PMC3409642)
Supplement: NIHMS394036-supplement-Supporting_Information.pdf [file NIHMS394036-supplement-Supporting_Information.pdf]

## Supporting information

**Use of Comparative Molecular Field Analysis, Comparative Molecular Similarity Indices Analysis, and Protein Homology Modeling to Elucidate the Catalytic Selectivity of Human UDP-glucuronosyltransferase 1A9"**

Baojian Wu, Xiaoqiang Wang, Shuxing Zhang, Ming Hu

**Table S1** Summary of the site(s) of glucuronidation for the phenolic compounds with multiple hydroxyl groups in this paper determined based on the literature.

| No. | Name              | Sites of Glucuronidation | References           |
|-----|-------------------|--------------------------|----------------------|
| 1   | EGCG              | 3'-OH and 4''-OH         | Lu et al., 2003      |
| 2   | EGC               | 3'-OH                    | Lu et al., 2003      |
| 18  | Emodin            | 3-OH                     | Liu et al., 2010     |
| 20  | Enterolactone     | 3-OH                     | Dean et al., 2004    |
| 22  | Raloxifene        | 6-OH                     | Change et al., 2009  |
| 26  | Hesperetin        | 3'-OH and 7-OH           | Brand et al., 2010   |
| 27  | Narigenin         | 7-OH                     | Xu et al., 2009      |
| 55  | Flavopiridol      | 7-OH                     | Ramírez et al., 2002 |
| 97  | Caffeic acid      | 3-OH and 4-OH            | Wong et al., 2010    |
| 100 | Biochanin A       | 7-OH                     | Chen et al., 2005    |
| 101 | Daidzein          | 7-OH                     | Zhang et al., 1999   |
| 102 | Dihydrodaidzein   | 7-OH*                    | Wu et al., 2011      |
| 103 | Equol             | 7-OH*                    | Wu et al., 2011      |
| 104 | Formononetin      | 7-OH                     | Chen et al., 2005    |
| 105 | Genistein         | 7-OH                     | Zhang et al., 1999   |
| 106 | Glycitein         | 7-OH                     | Chen et al., 2005    |
| 108 | Prunetin          | 5-OH                     | Joseph et al., 2007  |
| 138 | Resveratrol       | 3-OH                     | Brill et al., 2006   |
| 140 | Entacapone        | 3-OH                     | Lautala et al., 2000 |
| 142 | Mycophenolic acid | 4-OH                     | Change et al., 2009  |
| 145 | Tolcapone         | 3-OH                     | Lautala et al., 2000 |

\* Based on the fact that 7-OH group in the isoflavone backbone is the most favorable position for glucuronidation.

Brand W, Boersma MG, Bik H, Hoek-van den Hil EF, Vervoort J, Barron D, Meini W, Glatt H, Williamson G, van Bladeren PJ, Rietjens IM (2010) Phase II metabolism of hesperetin by individual UDP-glucuronosyltransferases and sulfotransferases and rat and human tissue samples. *Drug Metab Dispos.* **38**(4):617-25.

Brill SS, Furimsky AM, Ho MN, Furniss MJ, Li Y, Green AG, Bradford WW, Green CE, Kapetanovic IM, Iyer LV (2006) Glucuronidation of trans-resveratrol by human liver and intestinal microsomes and UGT isoforms. *J Pharm Pharmacol.* **58**(4):469-79.

- Chang JH, Yoo P, Lee T, Klopff W, Takao D (2009) The role of pH in the glucuronidation of raloxifene, mycophenolic acid and ezetimibe. *Mol Pharm.* **6**(4):1216-27.
- Chen J, Lin H, Hu M (2005) Absorption and metabolism of genistein and its five isoflavone analogs in the human intestinal Caco-2 model. *Cancer Chemother Pharmacol.* **55**(2):159-69.
- Dean B, Chang S, Doss GA, King C, Thomas PE (2004) Glucuronidation, oxidative metabolism, and bioactivation of enterolactone in rhesus monkeys. *Arch Biochem Biophys.* **429**(2):244-51.
- Joseph TB, Wang SW, Liu X, Kulkarni KH, Wang J, Xu H, Hu M (2007) Disposition of flavonoids via enteric recycling: enzyme stability affects characterization of prunetin glucuronidation across species, organs, and UGT isoforms. *Mol Pharm.* **4**(6):883-94.
- Lautala P, Ethell BT, Taskinen J, Burchell B (2000) The specificity of glucuronidation of entacapone and tolcapone by recombinant human UDP-glucuronosyltransferases. *Drug Metab Dispos.* **28**(11):1385-9.
- Liu W, Tang L, Ye L, Cai Z, Xia B, Zhang J, Hu M, Liu Z (2010) Species and gender differences affect the metabolism of emodin via glucuronidation. *AAPS J.* **12**(3):424-36.
- Lu H, Meng X, Li C, Sang S, Patten C, Sheng S, Hong J, Bai N, Winnik B, Ho CT, Yang CS. Glucuronides of tea catechins: enzymology of biosynthesis and biological activities (2003) *Drug Metab Dispos.* **31**(4):452-61.
- Ramírez J, Iyer L, Journault K, Bélanger P, Innocenti F, Ratain MJ, Guillemette C (2002) In vitro characterization of hepatic flavopiridol metabolism using human liver microsomes and recombinant UGT enzymes. *Pharm Res.* **19**(5):588-94.
- Wong CC, Meini W, Glatt HR, Barron D, Stalmach A, Steiling H, Crozier A, Williamson G (2010) In vitro and in vivo conjugation of dietary hydroxycinnamic acids by UDP-glucuronosyltransferases and sulfotransferases in humans. *J Nutr Biochem.* **21**(11):1060-8.
- Wu B, Kulkarni K, Basu S, Zhang S, Hu M (2011) First-pass metabolism via UDP-glucuronosyltransferase: a barrier to oral bioavailability of phenolics. *J Pharm Sci.* **100**(9):3655-81.
- Xu H, Kulkarni KH, Singh R, Yang Z, Wang SW, Tam VH, Hu M (2009) Disposition of naringenin via glucuronidation pathway is affected by compensating efflux transporters of hydrophilic glucuronides. *Mol Pharm.* **6**(6):1703-15.
- Zhang Y, Song TT, Cunnick JE, Murphy PA, Hendrich S (1999) Daidzein and genistein glucuronides in vitro are weakly estrogenic and activate human natural killer cells at nutritionally relevant concentrations. *J Nutr.* **129**(2):399-405.

**Figure S1** Chemical structures of 145 UGT1A9 substrates in this study. Numbering of the structures is consistent with that in Table 1.

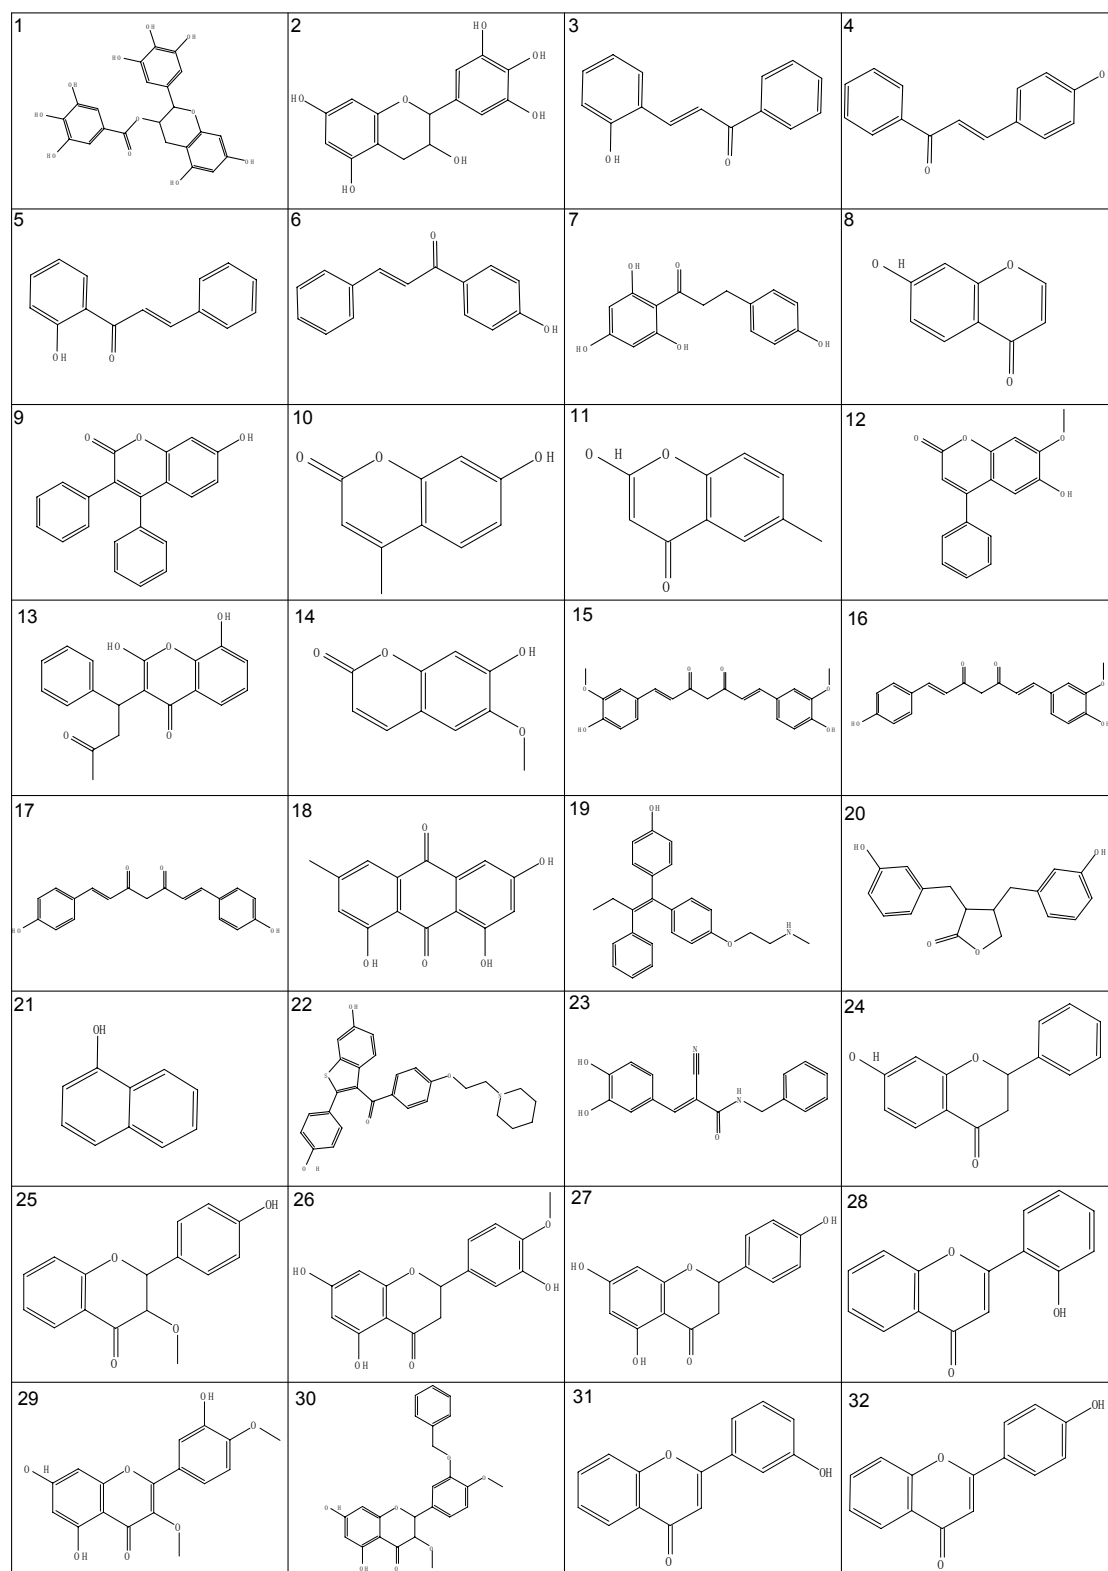

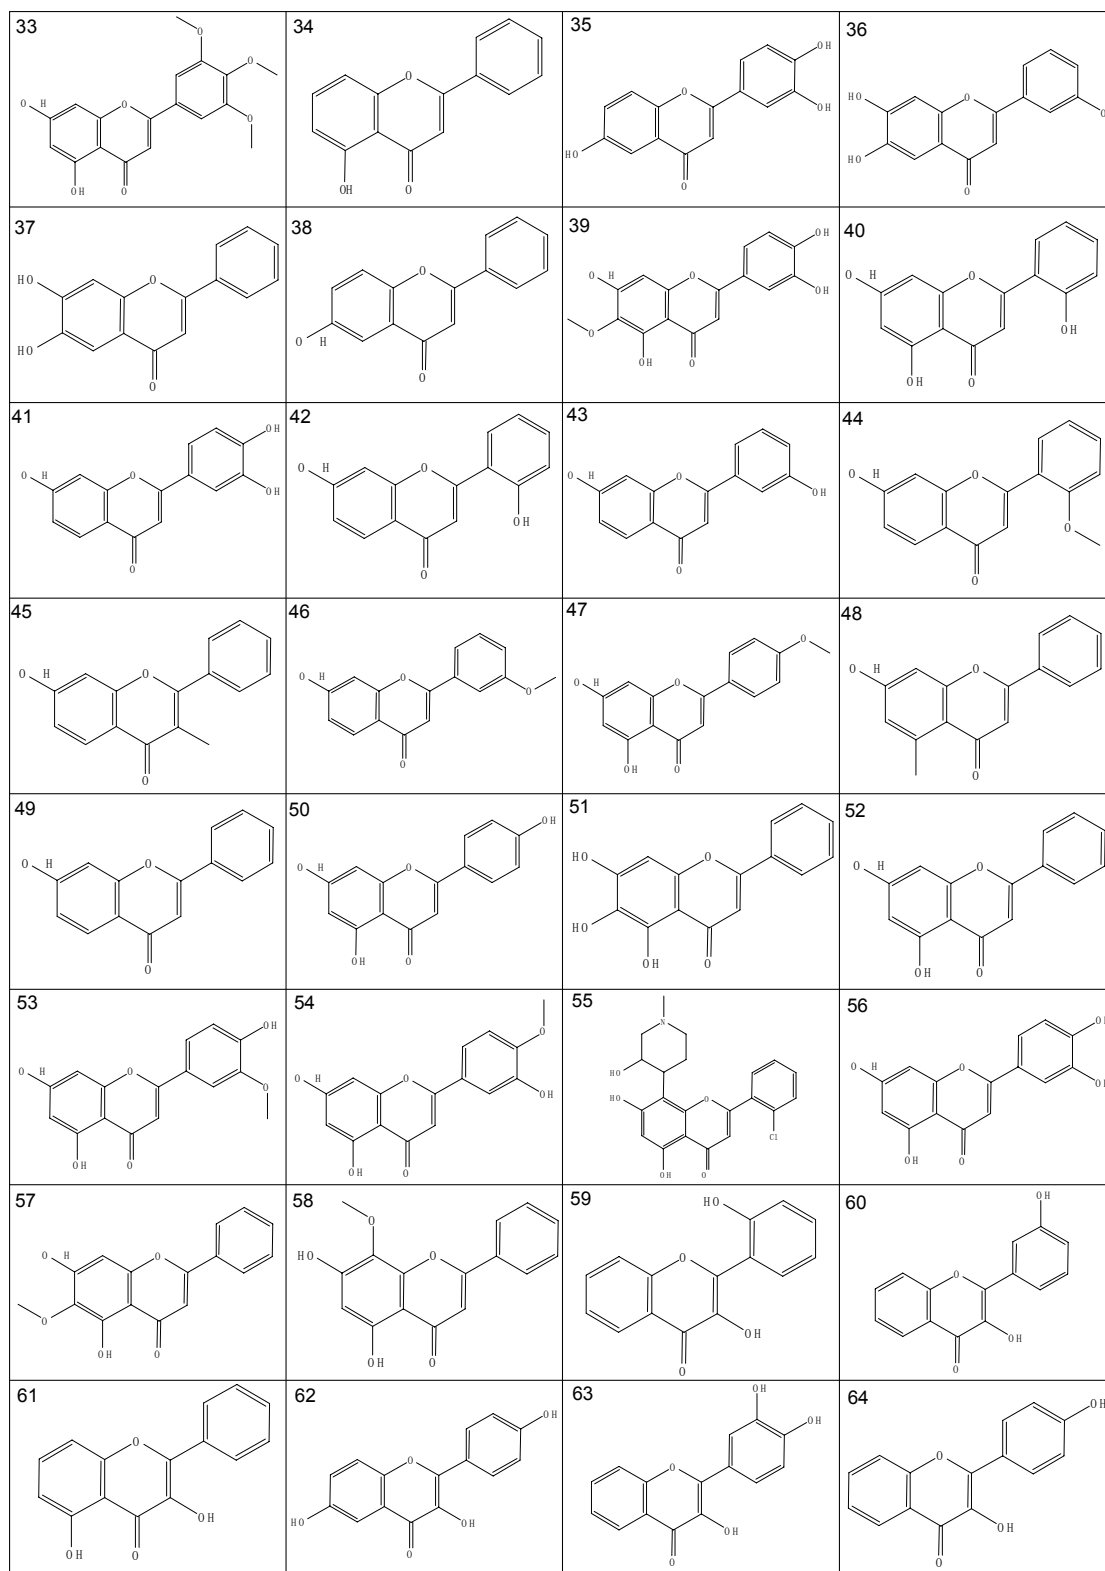

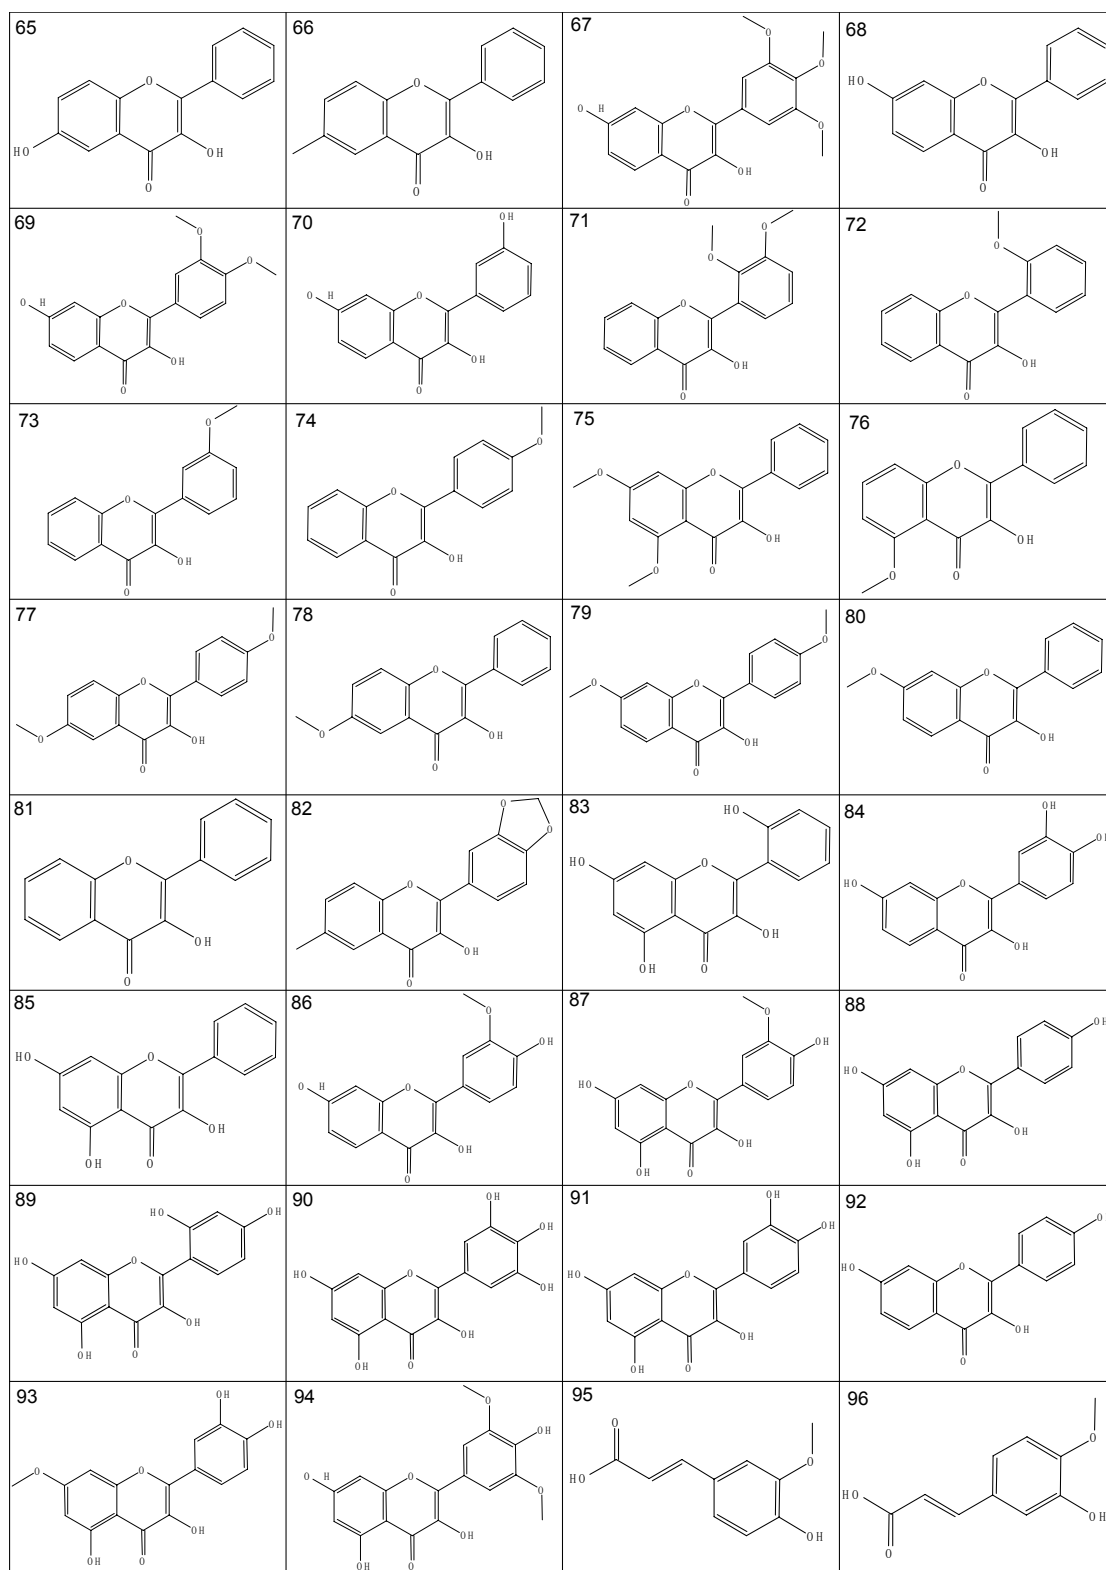

# Journal of Medicinal Chemistry

|                                                                                                       |                                                                                                       |                                                                                                        |                                                                                                         |
|-------------------------------------------------------------------------------------------------------|-------------------------------------------------------------------------------------------------------|--------------------------------------------------------------------------------------------------------|---------------------------------------------------------------------------------------------------------|
| <p><b>97</b></p> 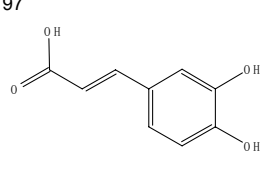    | <p><b>98</b></p>     | <p><b>99</b></p>     | <p><b>100</b></p>    |
| <p><b>101</b></p>    | <p><b>102</b></p>    | <p><b>103</b></p>    | <p><b>104</b></p>    |
| <p><b>105</b></p>    | <p><b>106</b></p>    | <p><b>107</b></p>    | <p><b>108</b></p>    |
| <p><b>109</b></p>    | <p><b>110</b></p>    | <p><b>111</b></p>    | <p><b>112</b></p>    |
| <p><b>113</b></p>  | <p><b>114</b></p>  | <p><b>115</b></p>  | <p><b>116</b></p>  |
| <p><b>117</b></p>  | <p><b>118</b></p>  | <p><b>119</b></p>  | <p><b>120</b></p>  |
| <p><b>121</b></p>  | <p><b>122</b></p>  | <p><b>123</b></p>  | <p><b>124</b></p>  |
| <p><b>125</b></p>  | <p><b>126</b></p>  | <p><b>127</b></p>  | <p><b>128</b></p>  |

Journal of Medicinal Chemistry

|                                                                                                |                                                                                              |                                                                                               |                                                                                                |
|------------------------------------------------------------------------------------------------|----------------------------------------------------------------------------------------------|-----------------------------------------------------------------------------------------------|------------------------------------------------------------------------------------------------|
| <p>129</p> 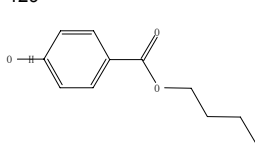   | <p>130</p>  | <p>131</p>  | <p>132</p>  |
| <p>133</p>    | <p>134</p>  | <p>135</p>  | <p>136</p>  |
| <p>137</p>    | <p>138</p>  | <p>139</p>  | <p>140</p>  |
| <p>141</p>    | <p>142</p>  | <p>143</p>  | <p>144</p>  |
| <p>145</p>  |                                                                                              |                                                                                               |                                                                                                |

**Figure S2 Protein sequence alignment of human UGT1A9 with the plant VvGT1 (pdb code: 2C1Z).** The aligned sequence identity between UGT1A9 and VvGT1 is 14.9%. Secondary structures ( $\alpha$ -helix in cyan,  $\beta$ -strands in magenta) are color shaded. The secondary structures of the human UGTs were determined by PSIPRED (McGuffin *et al.*, 2000). The 44-aa signature motif of UGTs is enclosed by a red box. Residues predicted to be in contact with aglycone substrate are highlighted in red, whereas the catalytic dyad residues (His37-Asp148) are highlighted in grey.

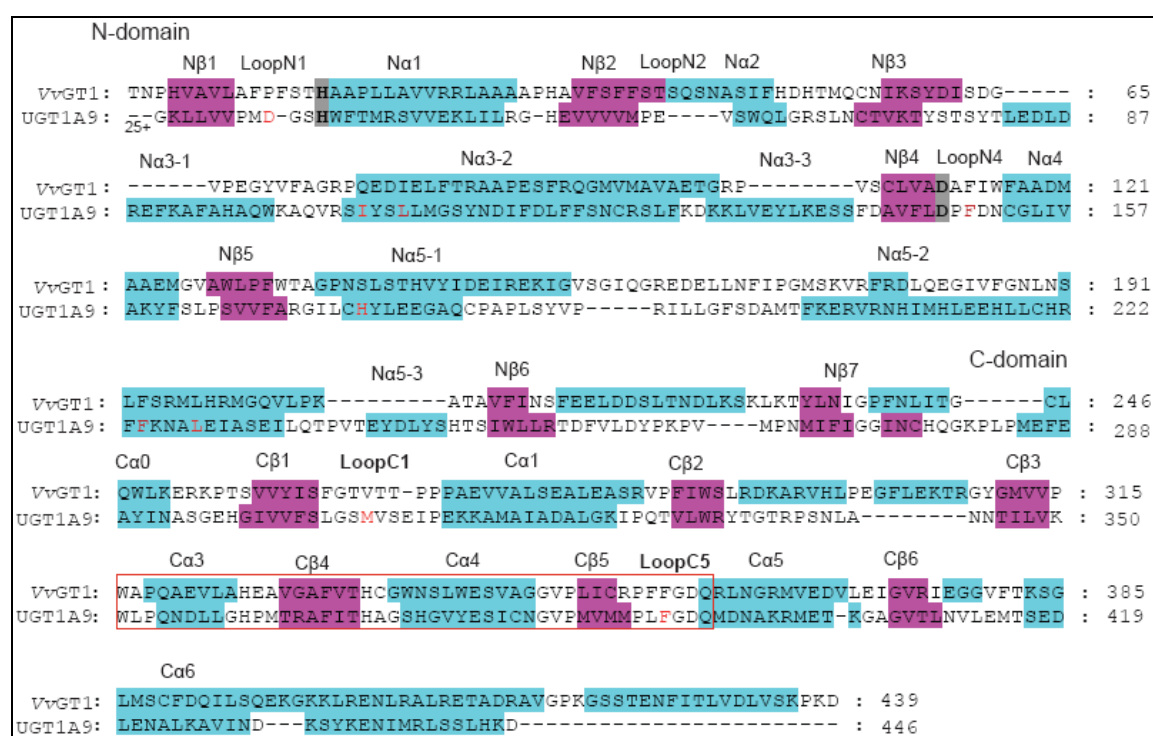

McGuffin LJ, Bryson K and Jones DT (2000) The PSIPRED protein structure prediction server. *Bioinformatics*. 16:404-405.



**Figure S3** A homology model of UGT1A9 constructed in the paper and the description of the binding pocket. The modeled structures are composed of two N- (in gray) and C-terminal (in light green) domains. The N- and C-terminal domains contain central stranded parallel sheets flanked by  $\alpha$ -helices on both sides. The two domains pack very tightly and form a deep cleft where the aglycone substrate and the cofactor are bound for reaction. N $\alpha$ 5-2 packs to N $\alpha$ 3-2, facilitating specific interactions (e.g. salt bridge) between the two regions. These interactions might play a role in the entry of the aglycone and in the departure of the product (Modolo *et al.*, 2009; Laakkonen and Finel, 2010). It was also proposed that residues in N $\alpha$ 3-2 area might go through some local conformational changes during substrate binding and subsequent product leaving (Modolo *et al.*, 2009). The substrate binding pocket is almost entirely formed by the N-terminal residues, although some C-terminal residues also contributed to the formation of the pocket. The pocket is primarily formed by LoopN1, N $\alpha$ 1, N $\alpha$ 3-2, LoopN4, N $\alpha$ 5-1, N $\alpha$ 5-2, Loop C1 and Loop C5. This is consistent with the topological arrangement of  $\beta$ -strands (3-2-1-4-5-6-7) of the UGT enzyme. N $\beta$ 2, N $\beta$ 3, N $\beta$ 6 and N $\beta$ 7 twisted far away from the core N $\beta$ 1 where the catalytic histidine situated. Loop N4 was located at the bottom of the pocket (far from the cofactor); N $\alpha$ 5-1 residues formed the wall in the end of the pocket; Loop N1 and N $\alpha$ 3-2 line the entrance of the pocket; Loop C1 and C5 cover the top of the pocket; the right side of the pocket is occupied by the residues in the N-terminus of N $\alpha$ 5-2. The cofactor is present at the left side of pocket. The catalytic residue histidine (in green stick mode) was located at the start of helix N $\alpha$ 1. The substrate kaempferol (in a 3-OH catalysis mode) is shown in stick-and-ball model.

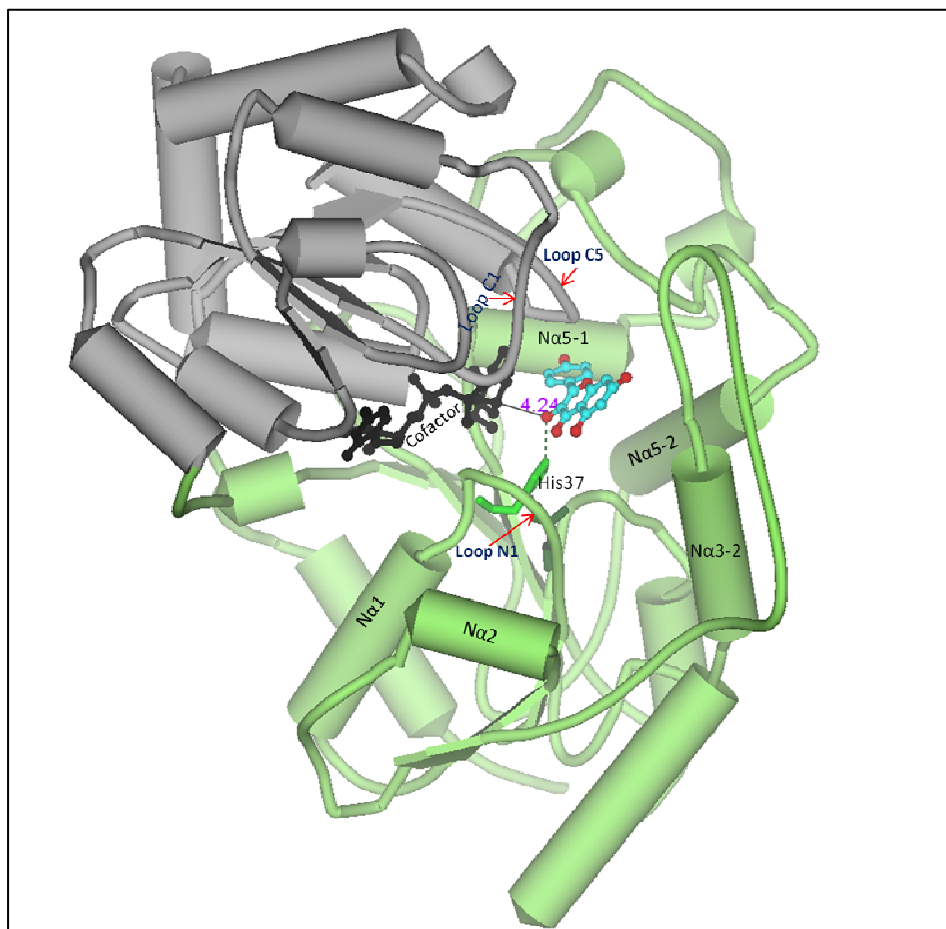

## Journal of Medicinal Chemistry

- Laakkonen L and Finel M (2010) A molecular model of the human UGT1A1, its membrane orientation and the interactions between different parts of the enzyme. *Mol Pharmacol* **77**(6):931-939
- Modolo LV, Li L, Pan H, Blount JW, Dixon RA, Wang X (2009) Crystal structures of glycosyltransferase UGT78G1 reveal the molecular basis for glycosylation and deglycosylation of (iso)flavonoids. *J Mol Biol.* **392**(5):1292-302.
